# Supplementary material for: Nitrogen-doped carbon coated SiO nanoparticles Co-modified with nitrogen-doped graphene as a superior anode material for lithium-ion batteries
Source: Royal Society of Chemistry journal article supplement (doi:10.1039/c4ra06678b), 2014-01-01
Supplement: c4ra06678b1.pdf [file c4ra06678b1.pdf]

## Electronic Supplementary Information for Nitrogen-Doped Carbon Coated SiO Nanoparticles Co-modified with Nitrogen-Doped Graphene as Superior Anode Material for Lithium-ion Batteries

Chenfeng Guo <sup>a</sup>, Jingxuan Mao <sup>b</sup>, Dianlong Wang <sup>a\*</sup>

<sup>a</sup> Harbin Institute of Technology, School of Chemical Engineering and Technology, Harbin 150001, P R China

<sup>b</sup> Harbin Engineering University, College of Software, Harbin 150001, P R China.

Fax: +86 451 86413721; Tel: +86 451 86413751

\* To whom correspondence should be addressed. E-mail: wangdianlonghit@163.com,  
chenfeng1984hit@aliyun.com

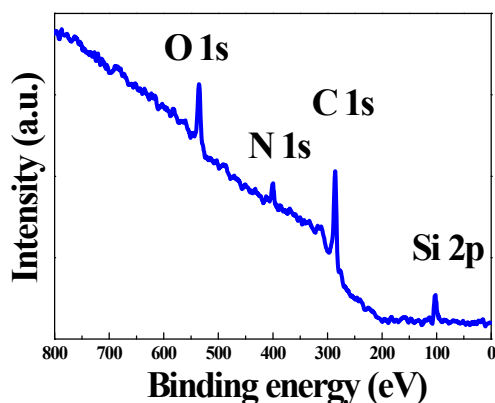

Figure S1. XPS survey scan of NC-SiO.

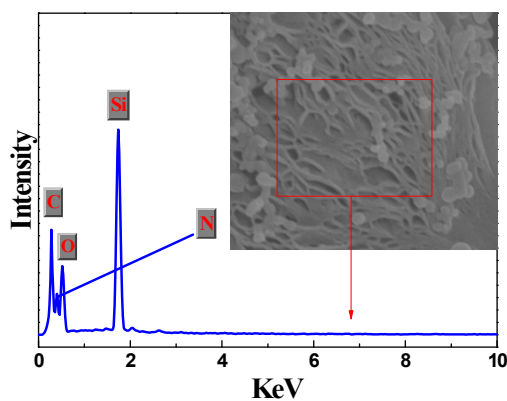

Figure S2. EDAX spectra from the surface of the ASiO/(NC+NG) NCPs.

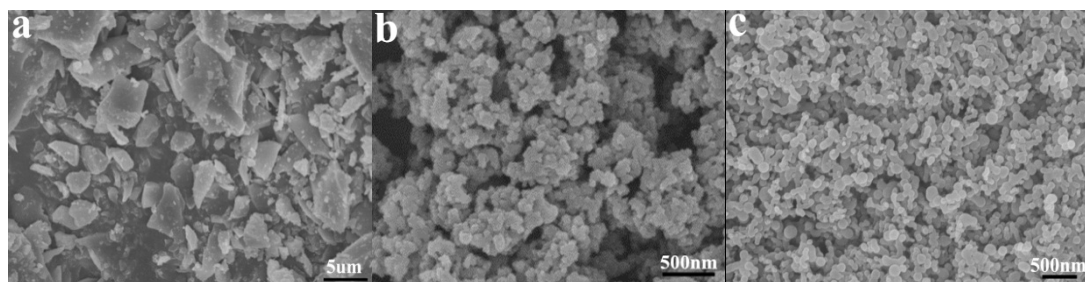

**Figure S3.** FESEM image of (a) as-received SiO powder; (b) ASiO NPs and (c) NC-ASiO NPs.

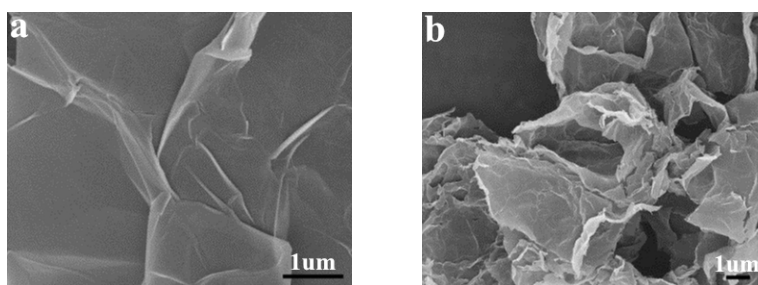

**Figure S4.** FESEM image of as-prepared (a) PG and (b) NG.

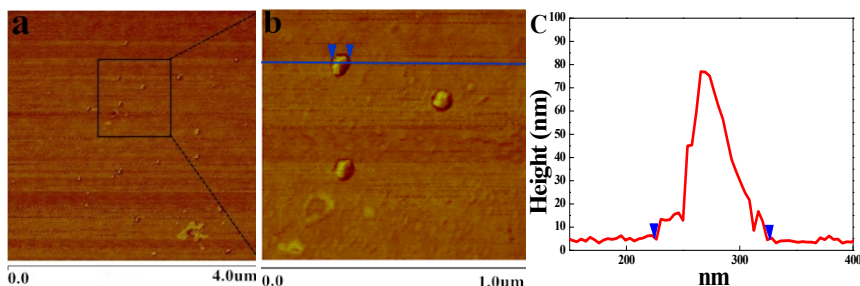

**Figure S5.** AFM images of ASiO/(NC+NG) NCPs at different magnification: (a) overing an area of 4μm by 4μm; (b) overing an area of 1μm by 1μm and (c) its section analysis.

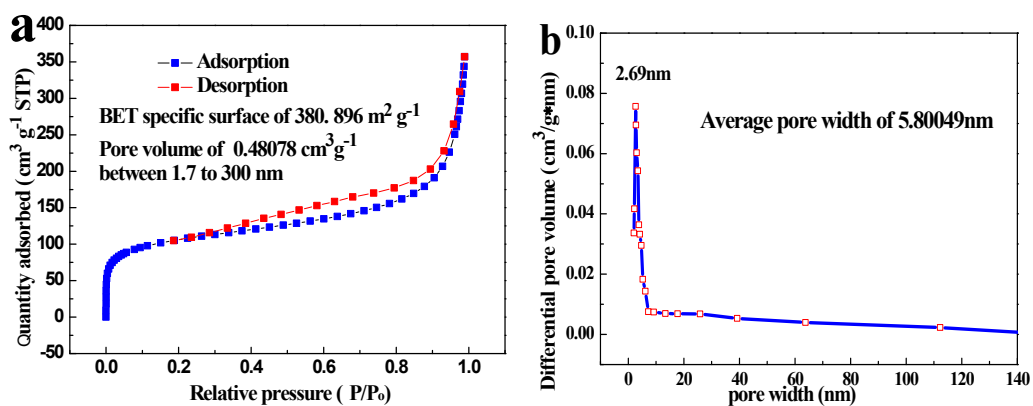

**Figure 6.** (a) Nitrogen adsorption/desorption isotherms at 77 K, and (b) pore-size distribution curves of ASiO/(NC+NG) NCPs.

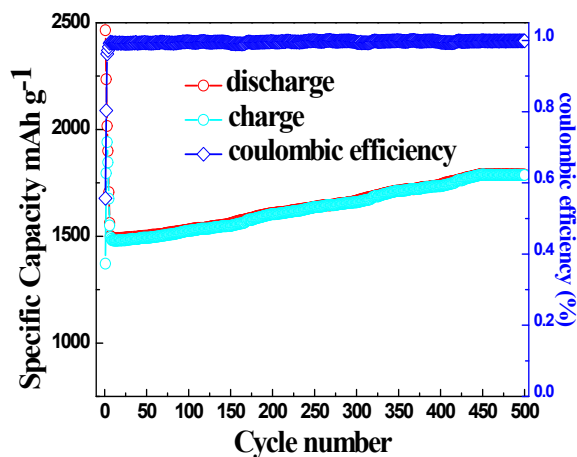

**Figure S7.** Superior cycle stability of ASiO/(NC+NG) NCPs in the long-run up to 500 cycles under a current density of 100 mA g<sup>-1</sup>. (Red: discharge capacity; cyan: charge capacity; blue: coulombic efficiency).

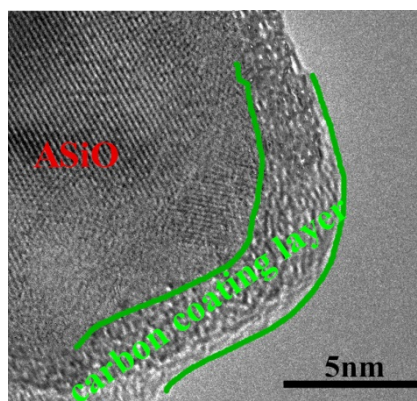

**Figure S8.** HRTEM image of C-ASiO. About 3 nm thickness of amorphous carbon coating layer is found on the surface of ASiO particle, which confirmed the similar coating thickness with NC coating layer. The similar size and morphology of C-ASiO and NC-ASiO, coupled with the similar results of ASiO content analysis and the XRD analysis could clarify the similarity of carbon coating and NC coating technique.

**Table S1.** Elemental Composition of ASiO/(NC+NG), ASiO/(NC+PG), NC-ASiO and C-ASiO.

| Sample       | C (wt%) | O (wt%) | Si (wt%) | N (wt%) |
|--------------|---------|---------|----------|---------|
| ASiO/(NC+NG) | 30.47   | 28.49   | 38.43    | 2.61    |
| ASiO/(NC+PG) | 31.37   | 29.41   | 38.44    | 0.78    |
| NC-ASiO      | 12.69   | 31.28   | 54.91    | 1.12    |
| C-ASiO       | 13.11   | 31.59   | 55.30    | 0.00    |

**Table S2.** The circuit parameters derived using equivalent circuit model for the ASiO/(NC+NG) electrode performed after 20th, 30th and 40th cycles.

| Electrodes (ASiO/(NC+NG)) | $R_e$ ( $\Omega$ ) | $R_f$ ( $\Omega$ ) | $Q_1$ ( $\mu F$ ) | $\eta_1$ | $C_1$ ( $\mu F$ ) | $R_{ct}$ ( $\Omega$ ) | $Q_2$ ( $\mu F$ ) | $\eta_2$ | $C_2$ ( $\mu F$ ) |
|---------------------------|--------------------|--------------------|-------------------|----------|-------------------|-----------------------|-------------------|----------|-------------------|
| 20th                      | 22.03              | 47.06              | 40.29             | 0.76     | 436.83            | 204.4                 | 130.5             | 0.72     | 6868.60           |
| 30th                      | 20.42              | 37.62              | 46.39             | 0.69     | 1327.10           | 176.6                 | 151.4             | 0.71     | 9736.09           |
| 40th                      | 18.96              | 35.56              | 51.26             | 0.69     | 1498.37           | 149.7                 | 165.9             | 0.71     | 10351.78          |
